# Supplementary material for: Direct Patlak Reconstruction of [68Ga]Ga-PSMA PET for the Evaluation of Primary Prostate Cancer Prior Total Prostatectomy: Results of a Pilot Study
Source: MDPI journal article supplement (doi:10.3390/ijms241813677), 2023-09-05
Supplement: s1 [file s1]

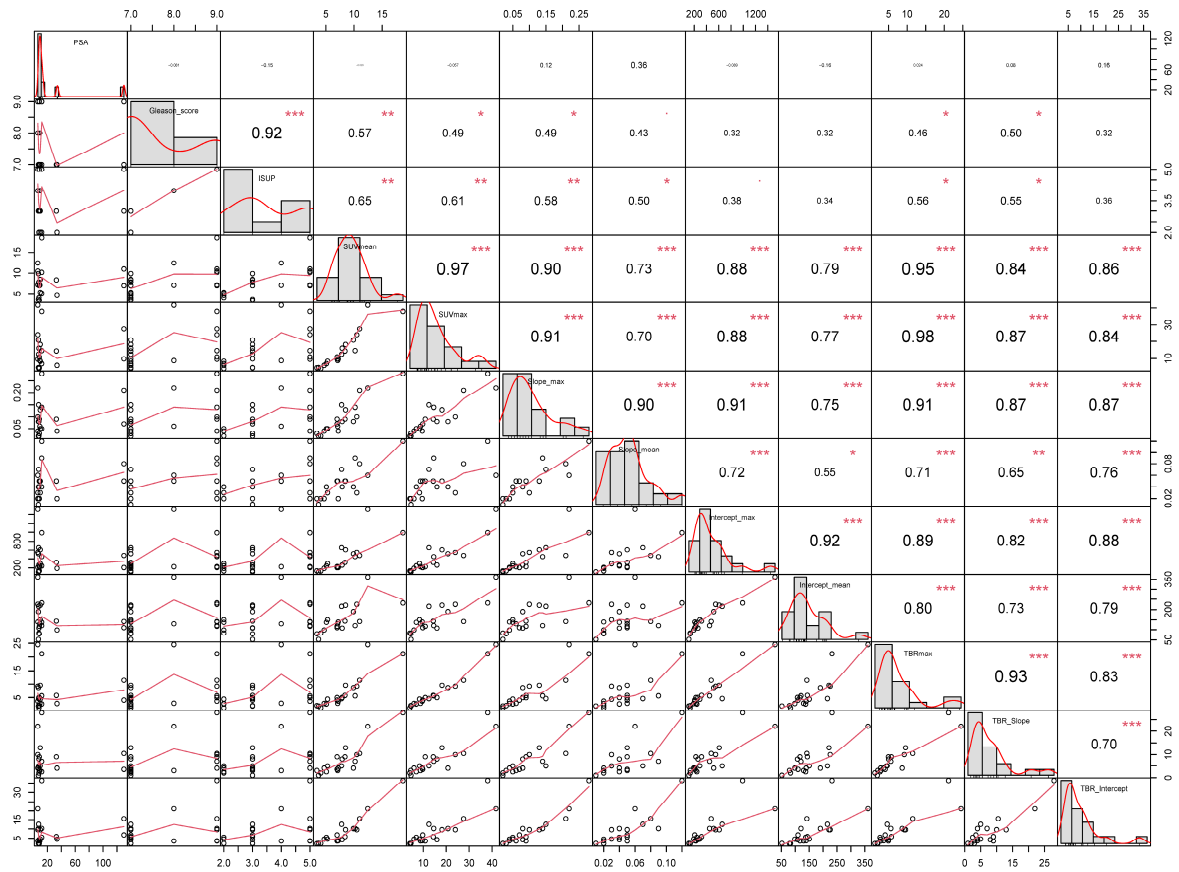

Figure S1: Values of Spearman's correlation coefficients analysis of all extracted static and dynamic imaging parameters in relation to Gleason score and ISUP grading. (\*) weak correlations. (\*\*) moderate correlations. (\*\*\*) strong correlations.
